# Supplementary material for: Mesoscopic fully printable perovskite light-emitting diodes in the near infra-red region
Source: Royal Society of Chemistry journal article supplement (doi:10.1039/d4tc02355b), 2024-01-01
Supplement: d4tc02355b1.pdf [file d4tc02355b1.pdf]

## Supporting information

# Mesoscopic fully printable perovskite Light Emitting Diodes in the Near Infra-Red

Maayan Sohmer-Tal and Lioz Etgar\*

Institute of Chemistry, Casali Center for Applied Chemistry, The Hebrew University of Jerusalem, Jerusalem 91904, Israel

[\\*lioiz.etgar@mail.huji.ac.il](mailto:lioiz.etgar@mail.huji.ac.il)

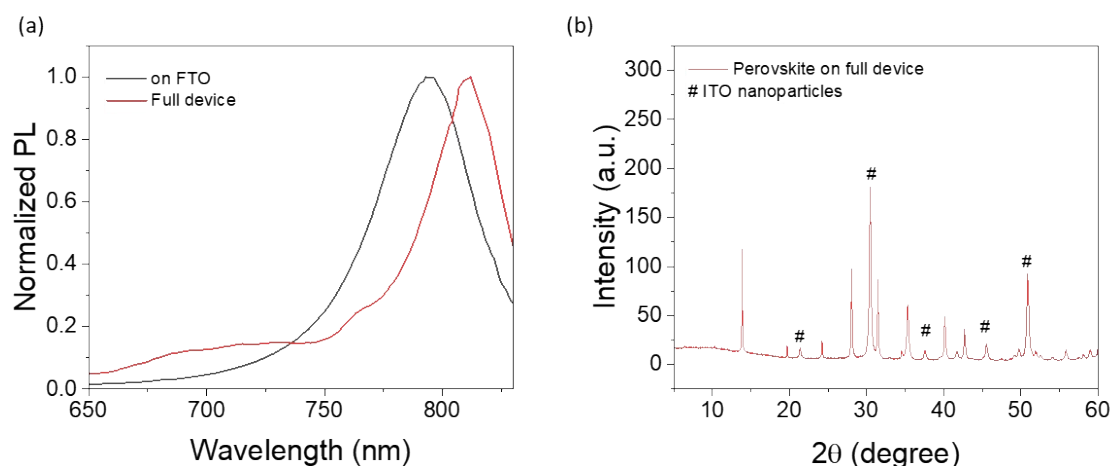

**Figure S1.** PL measurements of  $\text{FA}_{0.85}\text{MA}_{0.15}\text{Pb}(\text{I}_{0.85}\text{Br}_{0.15})_3$  deposited via two-step deposition method, on top of an FTO-coated glass and into a full ITO-PeLED. (b) XRD results of the perovskite deposited into a full device.

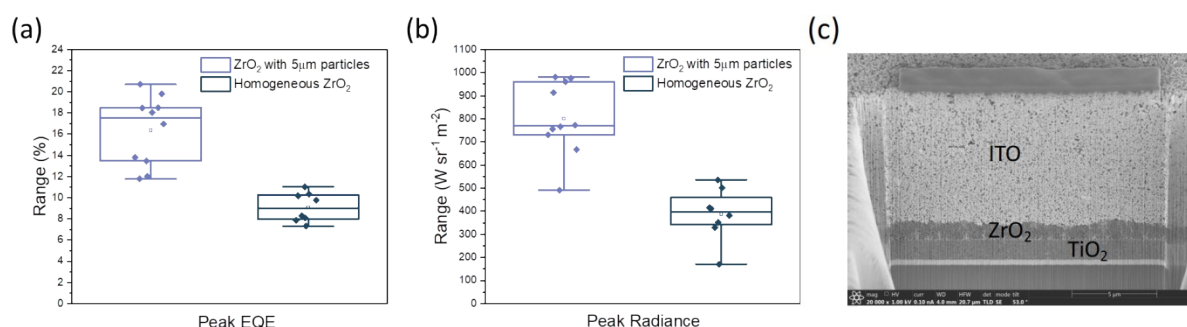

**Figure S2.** The statistical distribution of the ITO-PeLEDs. (a) Peak EQE. (b) Peak radiance. (c) A cross-sectional image of the ITO-PeLED with homogenous  $\text{ZrO}_2$ .

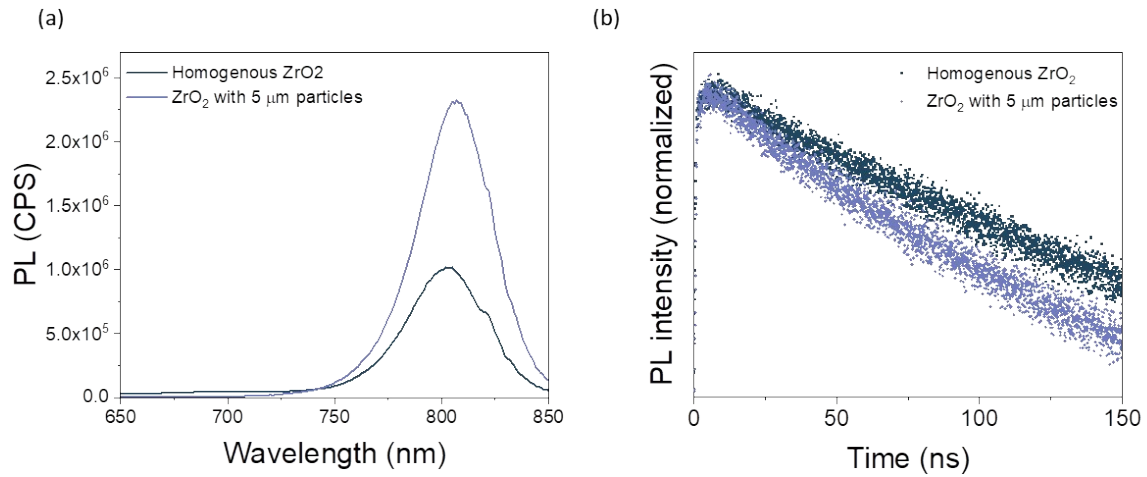

**Figure S3.** PL (a) and PL lifetime (b) of perovskite deposited on homogenous ZrO<sub>2</sub> and ZrO<sub>2</sub> with the large particles.

**Table S1.** Time constants and parameters calculated by two-exponential fitting ( $y=A_1\exp(-x/\tau_1)+A_2\exp(-x/\tau_2)$ ) to PL lifetime measurements.

|                                      | $\frac{A_1}{A_1 + A_2}$ | $\tau_1$ (ns) | $\frac{A_1}{A_1 + A_2}$ | $\tau_2$ (ns) | $\tau_{ave}$ (ns) |
|--------------------------------------|-------------------------|---------------|-------------------------|---------------|-------------------|
| Homogenous ZrO <sub>2</sub>          | 0.07                    | 20.0          | 0.93                    | 148.5         | 147.2             |
| ZrO <sub>2</sub> with 5 μm particles | 0.15                    | 21.9          | 0.85                    | 111.8         | 108.8             |

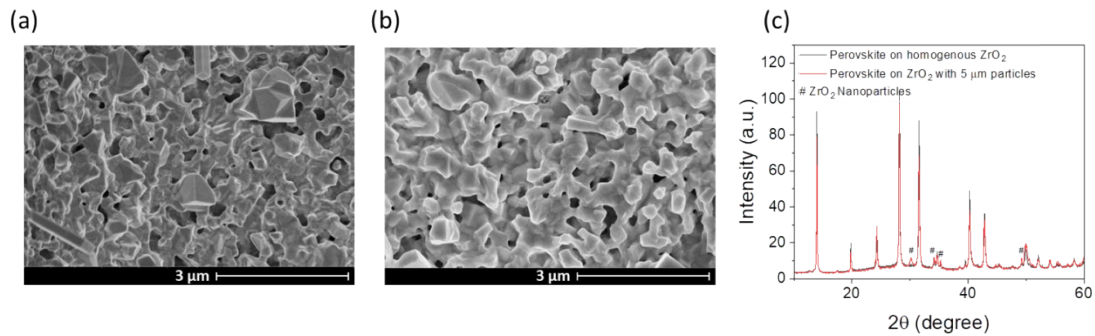

**Figure S4.** SEM images of perovskite deposited on (a) homogenous ZrO<sub>2</sub> (b) inhomogenous ZrO<sub>2</sub>. (c) XRD measurements of perovskite deposited on the homogenous ZrO<sub>2</sub> and the ZrO<sub>2</sub> with bigger particles.

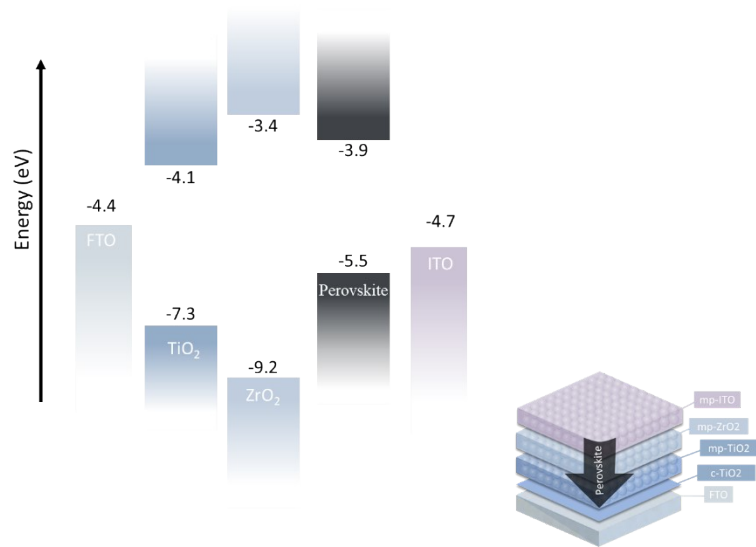

**Figure S5.** Energy level diagram of ITO-PeLED structure. The energy level values were taken from reference 1.

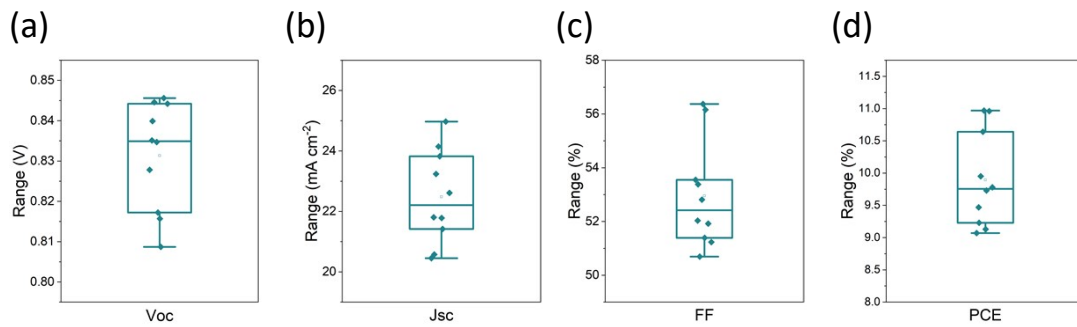

**Figure S6.** The statistical distribution of the PV parameters of the ITO-PeLEDs function as solar cells. (a)  $V_{oc}$ . (b)  $J_{sc}$ . (c) Fill factor. (d) PCE.

(a)

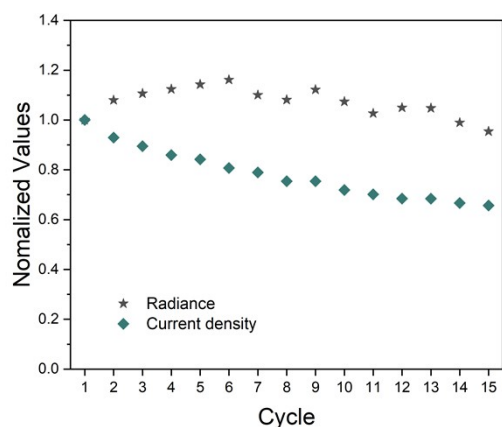

(b)

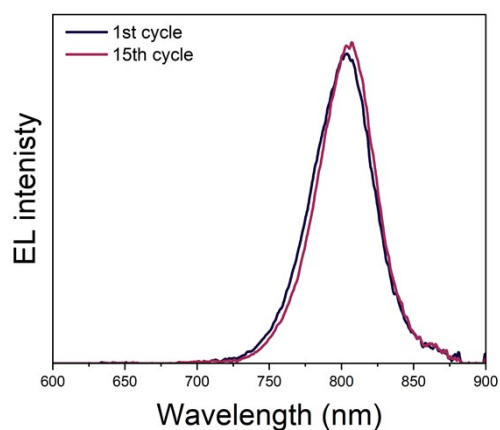

**Figure S7.** (a) Normalized radiance and Current density of ITO-PeLED through 15 sequential measurements. (b) EL peaks in the first and 15<sup>th</sup> cycles of use.

## References

- (1) Schneider, A.; Efrati, A.; Alon, S.; Sohmer, M.; Etgar, L. Green Energy by Recoverable Triple-Oxide Mesostructured Perovskite Photovoltaics. <https://doi.org/10.1073/pnas.2013242117/-/DCSupplemental>.
